# Supplementary material for: A survey on zoo mortality over a 12-year period in Italy
Source: PeerJ. 2019 Feb 6;7:e6198. doi: 10.7717/peerj.6198 (PMC6368840; doi:10.7717/peerj.6198)
Supplement: Data S1 [file peerj-07-6198-s001.xlsx]

## Sheet: 2005
n.caso	SPECIE	DIAGNOSI
714/2005	cavallo	setticemia
721/2005	moffetta	enfisema

## Sheet: 2006
n.caso	SPECIE	DIAGNOSI
396/2006	ungulato-daino	rottura intestino
402/2006	daino	placenta in situ,suturazione scoretta utero,feto morto in utero
742/2006	lama	polmonite

## Sheet: 2007
n.caso	SPECIE	DIAGNOSI
472/2007	capra	soffocamento da reflusso
475/2007	scoiattolo grigio	trauma
1056/2007	cervo	trauma
795/2007	capra	enterite/polmonite
657/2007	lepre patagonia	pseudotubercolosi

## Sheet: 2008
n.caso	SPECIE	DIAGNOSI
190/2008	lama	polmonite
353/2008	lama	polmonite
608/2008	coniglio	polmonite
609/2008	coniglio	polmonite
1001/2008	lepre della patagonia	setticemia

## Sheet: 2009
n.caso	SPECIE	DIAGNOSI
716/2009	tigre siberiana	emorragia interna/ colpo di calore

## Sheet: 2010
n.caso	SPECIE	DIAGNOSI
1179/2010	capra tibetana	enterite da clostridi e setticemia
343/2010	lepre
1180/2010	capra tibetana	enterite da clostridi e setticemia

## Sheet: 2011
n.caso	SPECIE	DIAGNOSI
191/2011	lama	setticemia, salmonella
1220/2011	antilope	pleurite acuta

## Sheet: 2012
n.caso	SPECIE	DIAGNOSI
64/2012	antilope	setticemia
418/2012	cervo porcino	trauma cranico
588/2012	cervo	actinobacillaus
589/2012	lepre	emotorace, emopericardio, emoperitoneo
603/2012	suino	pericardite
631/2012	lepre	emorragie
632/2012	cervo porcino	trauma toracico
680/2012	cervo	tossiemia-setticemia
770/2012	cervo	pericardite, polmonite cronica
1010/2012	lepre	polmonite
1011/2012	lepre	polmonite
1012/2012	lepre	polmonite
1013/2012	lepre	polmonite

## Sheet: 2013
n.caso	SPECIE	DIAGNOSI
335/2013	cervo	setticemia
336/2013	lama cucciolo	polmonite
337/2013	lemure	trauma, attacco intraspecifici
338/2013	lemure	trauma attacco intraspecific
339/2013	lemure	enterite
343/2013	lepre	polmonite
344/2013	coniglio nano	pleuropolmonite
345/2013	coniglio nano	polmonite necrotica purulenta
420/2013	tigre	emorragia polmonare
421/2013	coniglio	polmonite
424/2013	gazzella	polmonite
698/2013	gazzella di Mohr	agonico
699/2013	gazzella Thompson	parto distocico
700/2013	cervo	peritonite
1100/2013	cervo	polmonite necrotica purulenta

## Sheet: 2014
n.caso	SPECIE	DIAGNOSI
799/2014	gazzella	politrauma
1476/2014	gazzella
1494/2014	pony	insufficienza epatica
1496/2014	gazzella Thompson

[truncated: 1 more sheets: 2015]
