# Supplementary material for: A survey on zoo mortality over a 12-year period in Italy
Source: PeerJ. 2019 Feb 6;7:e6198. doi: 10.7717/peerj.6198 (PMC6368840; doi:10.7717/peerj.6198)
Supplement: Data S2 [file peerj-07-6198-s002.xls]

## Sheet: 2004
n.caso	SPECIE	DIAGNOSI
79/2004	leone	carcinoma bronco alveolare
156/2004	opossum	encefalite
172/2004	capra	broncopolmonite
173/2004	dromedario	enterite
174/2004	antilope	setticemia
175/2004	capra	atrofia gelatinosa grasso pericardico, polmonite
176/2004	antilope	polmonite
291/2004	yack	pachidermite, peritonite, petecchie, pleurite fibrinosa, setticemiaclostridiosi
371/2204	lama	trauma toracico conseguente a cornata
606/2004	nilgau	sospetta clostridiosi
718/2004	bue watusso	gastrite enterite cronica
?/2004	dromedario	granuloma settico
964/2004	bless bock	polmonite purulenta
1282/2004	eland	broncopolmonite
1308/2004	eland	setticemia
1372/2004	leone	peresi posteriore, eutanasia
1376/2004	bless bock	pleuropolmonite
1402/2004	leone	polomonite ab ingestis
1403/204	leone	polmonite ab ingestis

## Sheet: 2005
n.caso	SPECIE	DIAGNOSI
2/2005	giraffa	infarto miocardico
335/2005	capra
336/2005	capra
373/2005	leone bianco	pleuropolmonite fibrinpurulenta ab ingestis
575/2005	leone	moratalità neonatale
753/2005	leone	mesotelioma
1055/2005	leone bianco	polmonite fibrin purulenta
1179/2005	antilope	polmonite iperacuta
1185/2005	tigre	peritonite gastroenterite
1186/2005	ammotrago	trauma

## Sheet: 2006
n.caso	SPECIE	DIAGNOSI
1/2006	tigre	gastroenterite
41/2006	procione	emorragia toracica, trauma
70/2006	tigre	non det
297/2006	leone bianco	malformazione da consanguineità
200/2006	leone	colangioma cistico
307/2006	muflone	trauma
465/2006	leone bianco	mortalità neonatale
466/2006	leone bianco	mortalità neonatale
467/2006	leone bianco	mortalità neonatale
468/2006	leone bianco	mortalita neonatale
476/2006	cobi	politraumatismo/ trauma
475/2006	cobi	peritonite da corpo estraneo
601/2006	tigre siberiana	polmonite interstiziale acuta
602/2006	orice	polmonite
753/2006	cobi	polmonite acuta
754/2006	eland	trauma
885/2006	leone bianco	mmortalità neonatale
902/2006	leone bianco	polmonite acuta

## Sheet: 2007
n.caso	SPECIE	DIAGNOSI
46/2007	tigre siberiana	polmonite acuta
92/2007	eland	polmonite acuta
194/2007	procione	sospetto avvelenament oanticoagulanti
195/2007	ippopotamo	trauma
231/2007	gnu	trauma
542/2007	dromedario	feto abortito
647/2007	orice	trauma
668/2007	leone	polmonite apostematosa
687/2007	tigre siberiana	trauma regione frontale
791/2007	tigre siberiana	soffocamento
792/2007	tigre	polmonite acuta
793/2007	dromedario
794/2007	dromedario	granuloma settico
804/2007	tigre	soffocamento
805/2007	tigre	polmonite iperacuta
852/2007	tigre siberiana	rinopolmonite iperacuta
911/2007	orice	infez moraxella
1041/2007	ippopotamo	trauma
1084/2007	bufalo	tubercolosi

## Sheet: 2008
n.caso	SPECIE	DIAGNOSI
85/2008	leone	trauma, aggresiona da tigre
160/2008	cervo	morto per frattura in seguito a telenarcosi
161/2008	tigre siberiana	sospetto linfoma
238/2008	amadriadi	ipotermia
426/2008	cobo fassa	ipotermia
465/2008	orice	setticemia
690/2008	leone bianco	mortalità neonatale
691/2008	leone bianco	mortalità neonatale
692/2008	leone bianco	mortalità neonatale
693/2008	eland	broncopolmonite
753/2008	ammotrago	trauma
760/2008	leone	polmonite ab ingestis
761/2008	leone	polmonite
1001/2008	lepre della patagonia	enterite setticemia
1100/2008	leone bianco	mortalità neonatale
1101/2008	leone	mortalità neonatale
1099/2008	leone	mortalità neonatale
1110/2008	antilope alcina	setticemia iperacuta
1189/2008	orice	clostridiosi

## Sheet: 2009
n.caso	SPECIE	DIAGNOSI
22/2009	eland	ferita addome
23/2009	cobo	polmonite
24/2009	cobo	trauma
25/2009	cobo	enterite
26/2009	capra	linfoadenite
27/2009	capra	enterite/polmonite
28/2009	capra	enterite
29/2009	waterbuck	perotonite
30/2009	cobi	traume
31/2009	pecora	polmonite
32/2009	waterbuck	metrite
76/2009	tigre	ascesso polmonare
77/2009	tigre	nefrite cronica
78/2009	ammotrago	salmonellosi enterica
230/2009	capra	polmonite
208/2009	ippopotamo	schiacciamento
252/2009	ammotrago	setticemia
253/2009	ammotrago	enterite
308/2009capra tibetana		enterite
309/2009	ammotrago	enterite
343/2009	ammotrago	enterite
344/2009	lama	enterite
415/2009	dromedario	feto abortito
472/2009	leone	mortinatalità
719/2009	ammotrago	cahessia
951/2009	leone bianco	macroglossia
366/2009	ammotrago cucciolo	enterite/polmonite
1550/2009	ammotrago adulto	polmonite
1728/2009	ammotrago	ematoma e enterite
1795/2009	capra	broncopolmonite
1796/2009	asino bianco	colica
1906/2009	gnu	peritonite emorragica
1907/2009	pecora del cameroon	gravidanza-als

## Sheet: 2010
n.caso	SPECIE	DIAGNOSI
8/2010	watusso	tubercolosi
09/2010	tigre siberiana	ernia diaframmatica
10/2010	cobi	sospetto TBC
11/2010	capra	congestione polmonare
12/2010	capra	congestione polmonare
155/2010	orice	morte per anestesia
220/2010	pecora	congestione polmonare
483/2010	capra	idropericardio
649/2010	cobi cucciolo	mortalità neonatale
650/2010	ammotrago	mortalità neonatale,fratture cranio,emoperitoneo e emorragie
775/2010	tigre siberiana	attacco intraspecifici pentalogia di fallot
776/2010	orice	epatite parassitaria e polmonite
1031/2010	antilope	periepatite villosa e scadente ststo di nutrizione
1090/2010	orice	eutanasia per setticemia
1091/2010	cobi	setticemia
0174/2010	cobi	setticemia
1308/2010	cobi	trauma
1309/2010	capra tibetana	versamento pericardico

## Sheet: 2011
n.caso	SPECIE	DIAGNOSI
73/2011	tigre siberiana	eutanasia
74/2011	gnu cucciolo	emorragia del mesentere
75/2011	dromedario	mortalità neonatale
161/2011	tigre siberiana	trauma/attacco intraspecifico
191/2011	eland	setticemia
245/2011	orice	enterite
322/2001	antilope	infettivo
943/2011	orice	polmonite
965/2011	tigre siberiana	feti macerati e setticemia
1017/2011	dromedario	congestione polmonare/setticemia
1266/2011	antilope alcina	gastrite
1268/2011	antilope alcina	enterite
1270/2011	capra	edema cuore polmone
1272/2011	tigre
1411/2011	antilope	micobatteriosi

## Sheet: 2012
n.caso	SPECIE	DIAGNOSI
43/2012	cobi	setticemia
44/2012	cobi	trauma
151/2012	giraffa	setticemia
355/2012	bovino	setticemia
389/2012	bisonte americano	enterite
390/2012	capra cameroun	enterite
391/2012	capra	emotorace emorragie polmonari
668/2012	orice	cachessia
669/2012	pecora	polmonite
775/2012	ghepardo	carcinoma pancreatico

## Sheet: 2013
n.caso	SPECIE	DIAGNOSI
214/2013	ghepardo	nefrite interstiziale

[truncated: 1 more sheets: 2014]
