# Supplementary material for: A survey on zoo mortality over a 12-year period in Italy
Source: PeerJ. 2019 Feb 6;7:e6198. doi: 10.7717/peerj.6198 (PMC6368840; doi:10.7717/peerj.6198)
Supplement: Data S3 [file peerj-07-6198-s003.xls]

## Sheet: 2004
n.caso	SPECIE
531/2004	ammotrago
532/2004	furetto
598/2004	canguro
600/2004	capra tibetana
601/2004	pecora del cameroon
604/2004	capra tibetana
696/2004	ammotrago cucciolo non det
697/2004	lama
706/2004	canguro
707/2004	canguro
708/2004	canguro
709/2004	macaco di Giava
710/2004	daino
711/2004	daino bianco
713/2004	capra girgentaria
720/2004	antilope cervicapra
721/2004	daino cucciolo
722/2004	procione
728/2004	ammotrago
730/2004	antilope cervicapra
731/2004	capra tibetana
736/2004	ammotrago cucciolo trauma
738/2004	capra tibetana
739/2004	capra
740/2004	ammotrago
741/2004	c.axis
742/2004	muflone cucciolo
746/2004	capriolo
747/2004	maiale
829/2004	asino
830/2004	ammotrago
831/2004	ammotrago
871/2004	canguro
1341/2004	canguro
1342/2004	canguro
1345/2004	daino
1349/2004	capra d angora
1350/2004	antilope cervicapra
1354/2004	muflone cucciolo
1355/2004	3 capre tibetane

## Sheet: 2005
n.caso	SPECIE	DIAGNOSI
52/2005	canguro wallaby	congestione polmonare
242/2005	canguro wallaby	setticemia
547/2005	scoiattolo
698/2005	furetto
708/2005	cane della prateria	neoplasia epatica cistica
709/2005	scoiattolo	broncopolmonite
710/2005	furetto	enterite emorragica
802/2005	antilope	broncopolmonite
804/2005	ammotrago	emotorace, perforazione polmone dx
805/2005	capra tibetana	bronpolmonite e pleurite fibrinosa
806/2005	canguro	emopericardio, perisplenite
807/2005	canguro	steatosi epatica
811/2005	ammotrago	cisticerco tenuicollis, polmonite
812/2005	capra	emotorace, emoperitoneo, emopericardio. Trauma
813/2005	capra d angora	ipertiroidismo, emopericardio, steatosi
814/2005	daino	pleuropolmonite fibrinosa
846/2005	antilope	peritonite, miodistrofia cardiaca
847/2005	capra nana	emotorace emoperitoneo. Trauma
848/2005	cervo	broncopolmonite

## Sheet: 2006
n.caso	SPECIE	DIAGNOSI
60/2006	cercopiteco etiopico	enfisema polmonare
272/2006	volpe	broncopolmonite
